# Supplementary material
Source: ML conference proceedings conference paper supplement (https://openaccess.thecvf.com/content/CVPR2022/html/Dai_BigDL_2.0_Seamless_CVPR_2022_paper.html)
Supplement: Supplementary file 1 [file Dai_BigDL_2.0_Seamless_CVPR_2022_supplemental.pdf]

## Online Demos

The online demos for the paper are located at <https://jason-dai.github.io/cvpr2022/>
